# Supplementary material for: The Potency of an Anti-MERS Coronavirus Subunit Vaccine Depends on a Unique Combinatorial Adjuvant Formulation
Source: PubMed Central journal article supplement (PMC7350031; doi:10.3390/vaccines8020251), 2020-05-27
Supplement: vaccines-08-00251-s001.pdf [file vaccines-08-00251-s001.pdf]

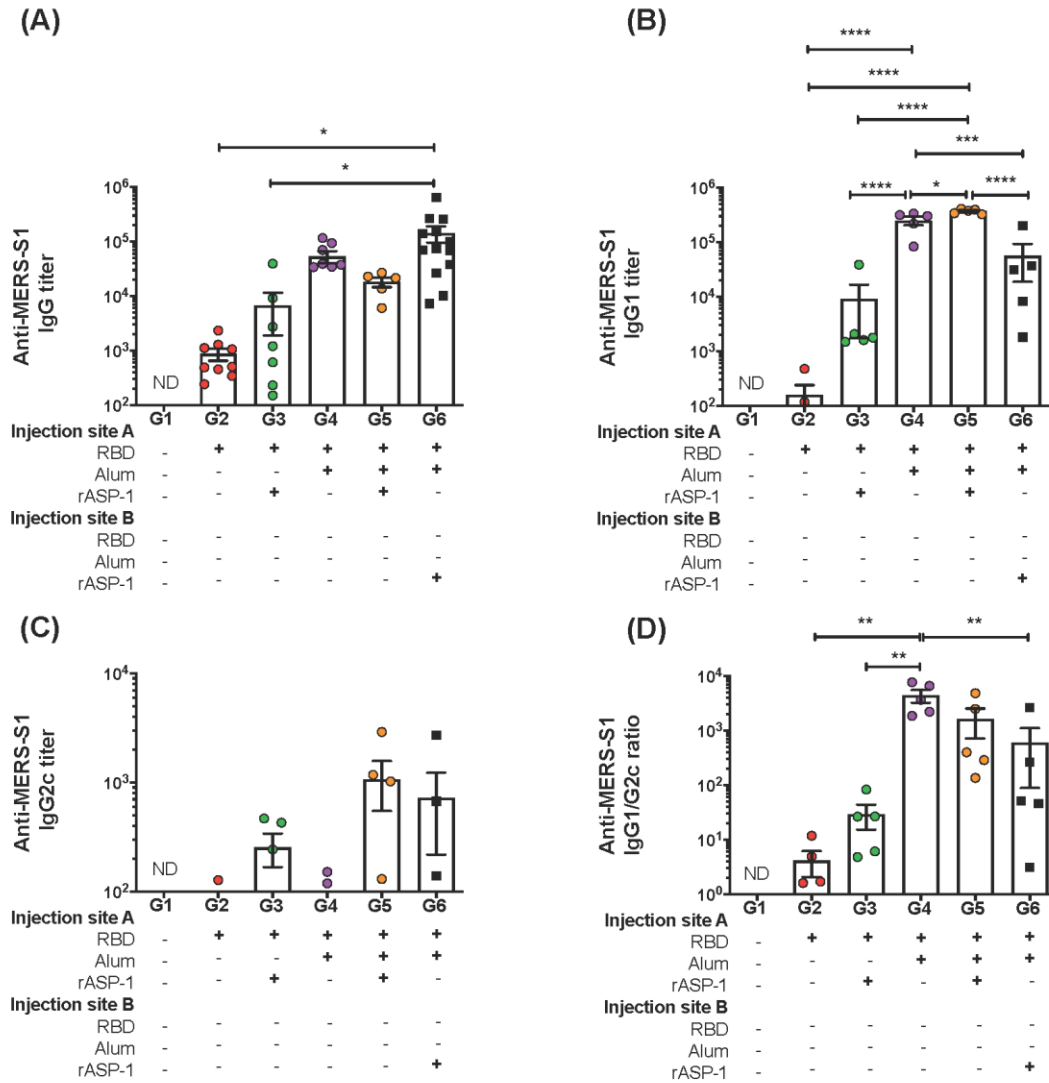

**Figure S1. Induction of MERS-CoV-RBD specific IgG subtypes in sera of immunized mice:** C57BL/6 mice were immunized i.m. with MERS-RBD-Fd with or without alum and rASP-1 alone or together using different combinations and/or formulations (Table 1 and X-axis legend). Sera samples were collected 7 days post-2<sup>nd</sup> immunization and assayed with MERS-CoV S1 as the target antigen for RBD-specific (A) IgG, (B) IgG1 and (C) IgG2c antibodies. (D) IgG1/G2c ratio. The data is from two independent experiments with 3 to 5 mice per group (for IgG) and a subset of 5 mice per group from one experiment for IgG1 and IgG2c. The data represent endpoint serum dilutions that remain positively detectable: mean and standard error. "+" indicates the presence and "-" indicates the absence of the protein or adjuvants in the formulation. Statistics was performed using one-way ANOVA with Tukey's multiple comparison.  $p < 0.05$ : \*,  $p < 0.01$ : \*\*,  $p < 0.001$ : \*\*\*,  $p < 0.0001$ : \*\*\*\*. ND: not

detectable,

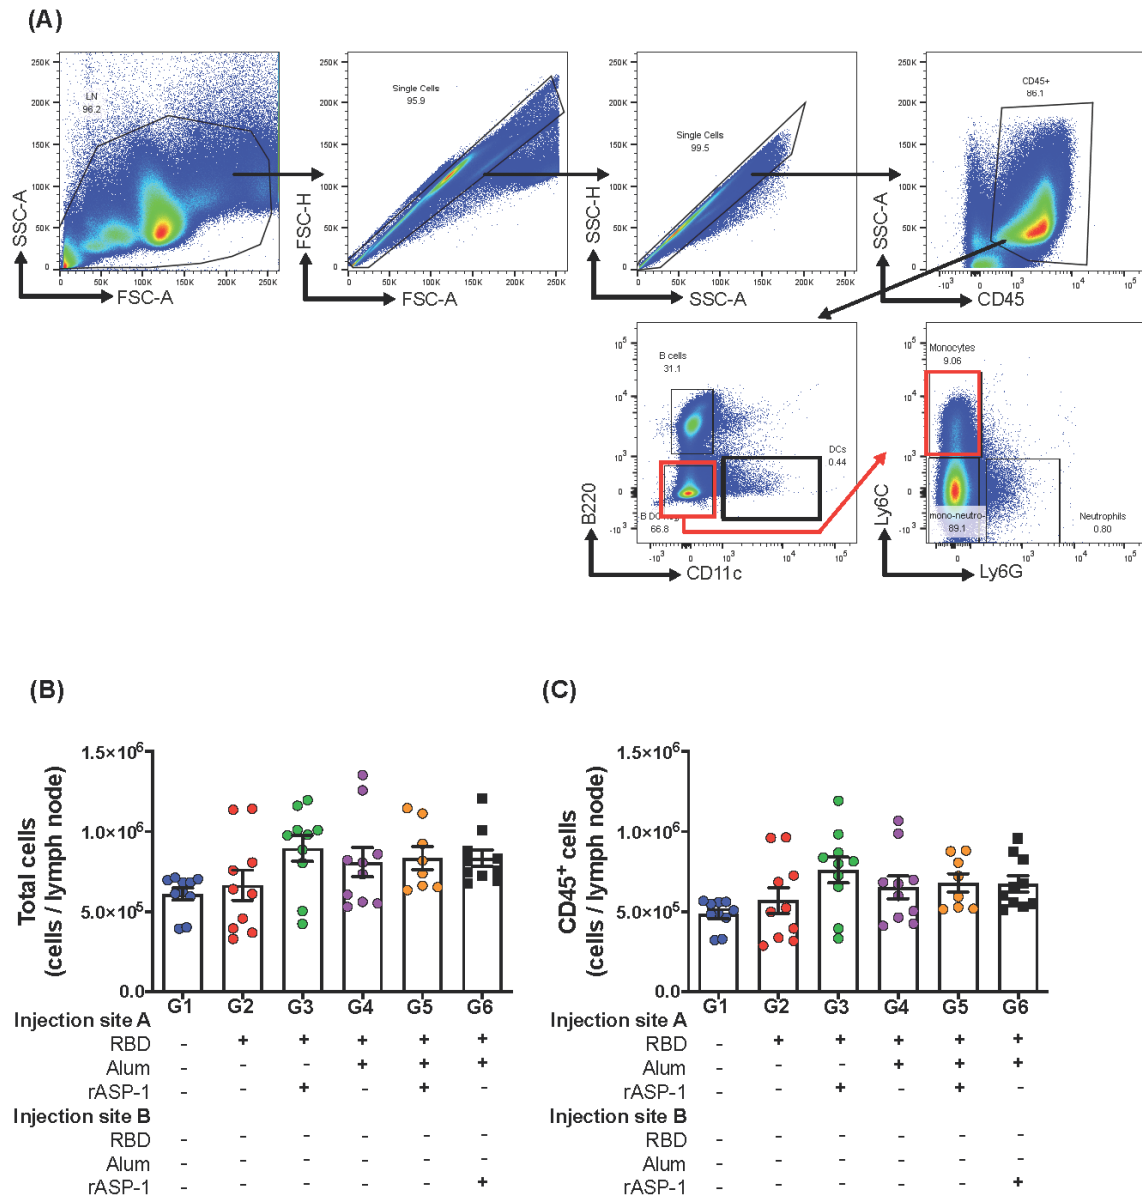

**Figure S2: Representative flow cytometry plot determining the gating strategy of the immune cells recruited to the draining lymph nodes (LNs) of immunized mice:** C57BL/6 mice were immunized i.m. with MERS-RBD-Fd with or without alum and rASP-1 alone or together using different combinations and/or formulations (Table 1 and X-axis legend). (A) Representative gating strategy of the immune cells recruited to the LNs. The draining lymph nodes were harvested 7 days post-2<sup>nd</sup> immunization and (B) the total number of cells and (C) CD45<sup>+</sup> immune cells were analyzed per LN. The experiment was done once, and the data presented are from left and right draining LNs of 5 mice per group: mean and standard error. “+” indicates the presence and “-” indicates the absence of the protein or adjuvants in the formulation. Statistics was performed using one-way ANOVA

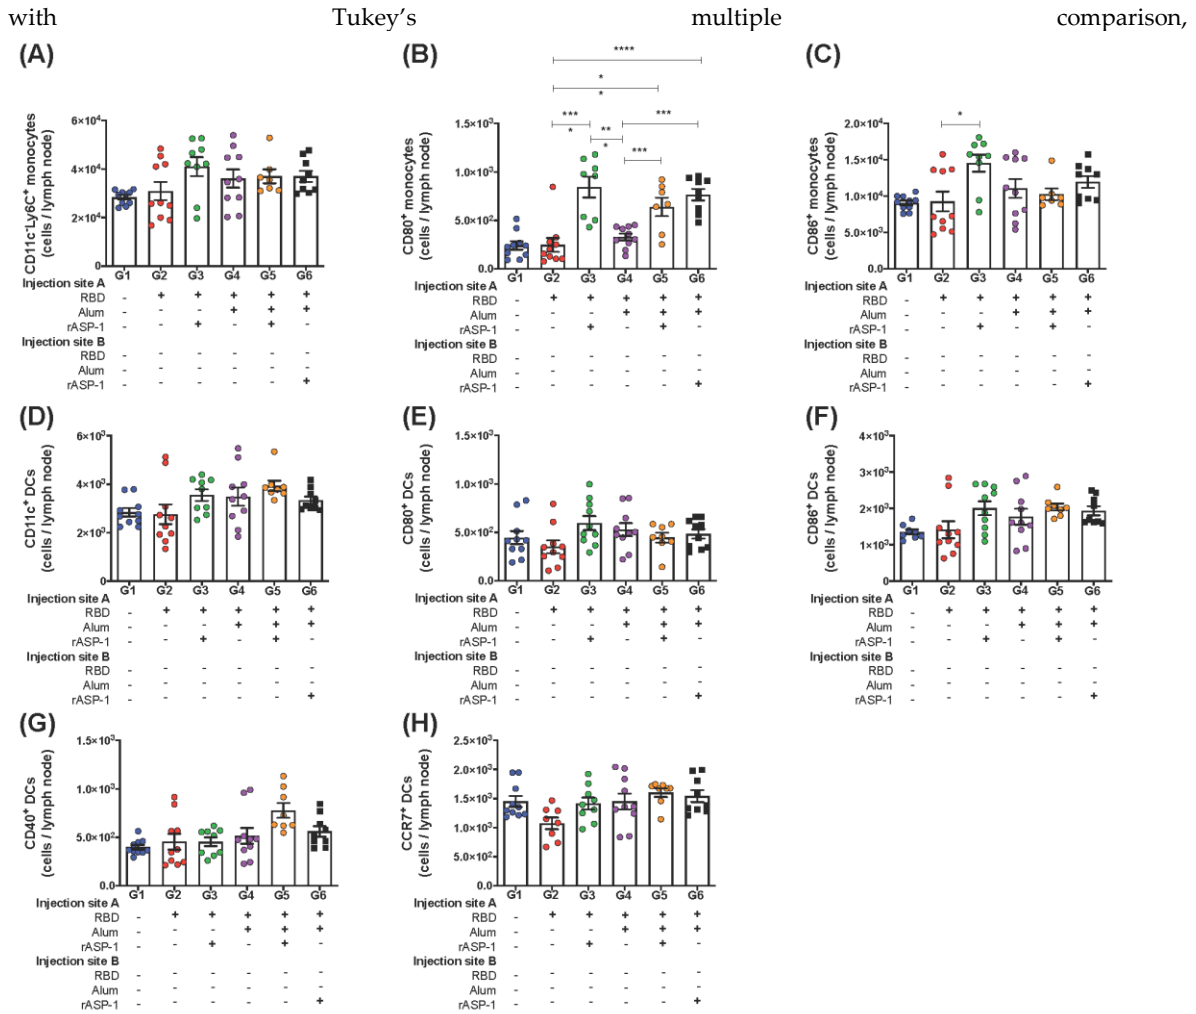

**Figure S3: Number of monocyte and DC subsets recruited into the lymph nodes (LNs) of immunized mice:** C57BL/6 mice were immunized i.m. with MERS-RBD-Fd with or without alum and rASP-1 alone or together using different combinations and/or formulations (Table 1 and X-axis legend). The draining lymph nodes were harvested 7 days post-2<sup>nd</sup> immunization and the number of **(A)** monocytes (CD45<sup>+</sup>CD11c<sup>+</sup>Ly6C<sup>+</sup>), **(B)** CD80<sup>+</sup> monocytes, **(C)** CD86<sup>+</sup> monocytes, **(D)** DCs (CD45<sup>+</sup>CD11c<sup>+</sup>), **(E)** CD80<sup>+</sup> DCs, **(F)** CD86<sup>+</sup> DCs, **(G)** CD40<sup>+</sup> DCs, and **(H)** CCR7<sup>+</sup> migratory DCs were analyzed per LN. The experiment was done once, and the data presented is from left and right draining LNs of 5 mice per group: mean and standard error. “+” indicates the presence and “-” indicates the absence of the protein or adjuvants in the formulation. Statistics was performed using one-way ANOVA with Tukey’s multiple comparison

**(A)**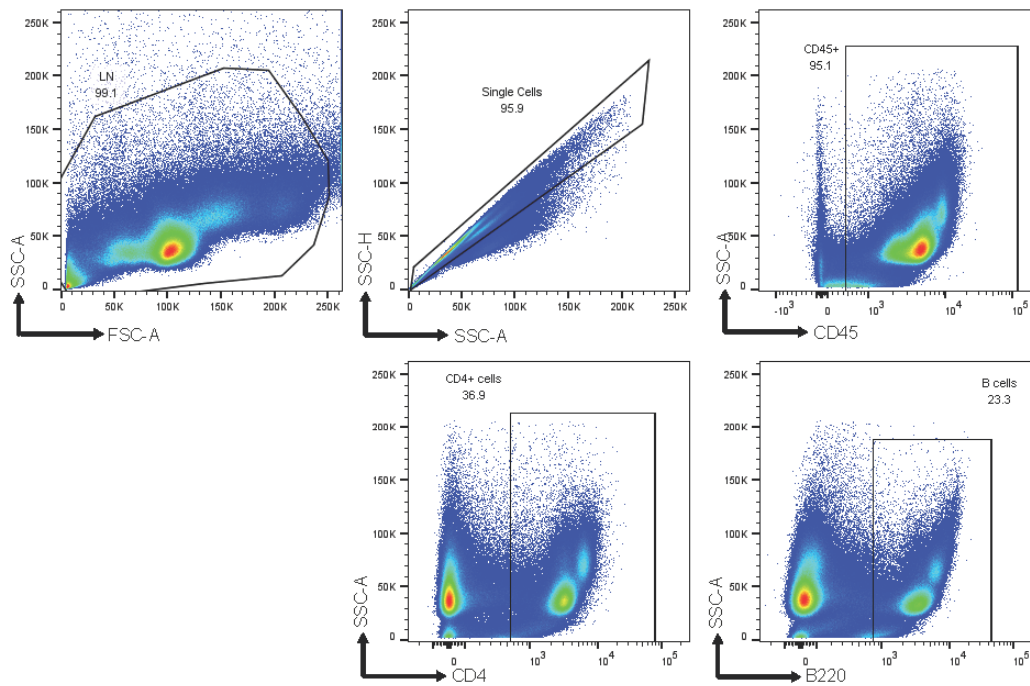**(B)**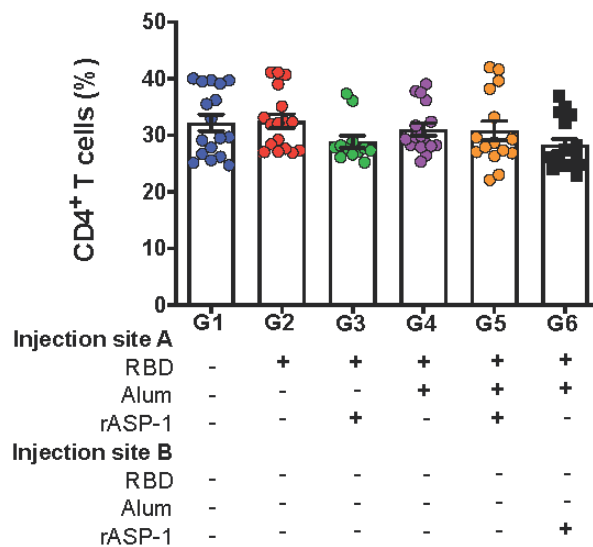

**Figure S4. Frequency of CD4<sup>+</sup> T cells in the lymph nodes (LNs) of immunized mice:** C57BL/6 mice were immunized i.m. with MERS-RBD-Fd with or without alum and rASP-1 alone or together using different combinations and/or formulations (Table 1 and X-axis legend). The draining LNs were harvested 7 days post-2<sup>nd</sup> immunization. **(A)** Representative flow cytometry plot determining the gating strategy of CD4<sup>+</sup> T cells and B220<sup>+</sup> B cells per LN. **(B)** The frequency of CD4<sup>+</sup> T cells per LN were analyzed. “+” indicates the presence and “-” indicates the absence of the protein or adjuvants in the formulation. Statistics was performed using one-way ANOVA with Tukey’s multiple comparison.
